# Supplementary material
Source: publisher figshare collection journal article supplement (https://acs.figshare.com/ndownloader/files/4229041)
Supplement: Supplementary file 1 [file 4229041]

#============================================================================== 

data_New_Global_Publ_Block

#==============================================================================


# SUBMISSION DETAILS

_publ_contact_author_name            
'M.P. Pitt'   # Name of author for correspondence
_publ_contact_author_address             # Address of author for correspondence

;
Queensland Micro and Nanotechnology Centre, Griffith University, Brisbane 4111,
 Australia.
;

_publ_contact_author_email           'mark.pitt@gmail.com'
_publ_contact_author_fax             '+61 7 3735 7773'
_publ_contact_author_phone           '+61 7 3735 7240'

_publ_contact_letter
;
Please consider this CIF for publication. I certify that this contibution is the
original work of those listed as authors; that it has not been published
before (in any language or medium) and is not being considered for publication
elsewhere; that all authors concur with and are aware of the submission; that
all workers involved in the study are listed as authors or given proper credit
in the acknowledgements; that I have obtained permission for and acknowledged
the source of any excerpts from other copyright works; and that to the best of
my knowledge the paper contains no statements which are libellous, unlawful or
in any way actionable. All coauthors have made significant scientific
contributions to the work reported, including the ideas and their execution,
and share responsibility and accountability for the results.
;
   
_publ_requested_journal              
'Journal of Physical Chemistry C'  

#==============================================================================

# TITLE AND AUTHOR LIST

_publ_section_title
;
An in-situ neutron diffraction study of the deuteration of isotopic Mg11B2
;
 
# The loop structure below should contain the names and addresses of all 
# authors, in the required order of publication. Repeat as necessary.

# NB if using publCIF, the Author database tool might prove useful
# (see the Tools menu in publCIF)

loop_
_publ_author_name
_publ_author_address
_publ_author_footnote
_publ_author_email
'Pitt, M.P.'
;
Queensland Micro and Nanotechnology Centre, Griffith University, Brisbane 4111,
Australia.
;
.
;
mark.pitt@gmail.com
;
'Webb, C.J.'
;
Queensland Micro and Nanotechnology Centre, Griffith University, Brisbane 4111,
Australia.
;
.
.
'Paskevicius, M.'
;
Department of Imaging and Applied Physics, Curtin University of Technology, GPO
Box U 1987, Perth, WA, Australia.
;
.
.
'Sheptyakov, D.'
;
Paul Scherrer Institute, CH-5232 Villigen PSI, Switzerland
;
.
.
'Buckley, C.E.'
;
Department of Imaging and Applied Physics, Curtin University of Technology, GPO
Box U 1987, Perth, WA, Australia.
;
.
.
'Gray, E.MacA.'
;
Queensland Micro and Nanotechnology Centre, Griffith University, Brisbane 4111,
Australia.
;
.
.


data_crystal
_chemical_name_systematic   
;
Mg(BD4)2
;
_cell_formula_units_Z   64
_diffrn_ambient_temperature 298
_cell_measurement_temperature   298
_chemical_formula_iupac   Mg(BD4)2
_chemical_name_mineral Mg(BD4)2
_cell_length_a  37.04892
_cell_length_b  18.49186
_cell_length_c  10.85945
_cell_angle_alpha 90
_cell_angle_beta  90
_cell_angle_gamma 90
_cell_volume 7439.845
_symmetry_cell_setting   orthorhombic
_symmetry_space_group_name_H-M Fddd
loop_
_symmetry_equiv_pos_as_xyz
	'-x, -y, z'
	'-x, -y+1/2, z+1/2'
	'-x, y, -z'
	'-x, y+1/2, -z+1/2'
	'-x+1/4, -y+1/4, -z+1/4'
	'-x+1/4, -y-1/4, -z-1/4'
	'-x+1/4, y+1/4, z+1/4'
	'-x+1/4, y-1/4, z-1/4'
	'-x+1/2, -y, z+1/2'
	'-x+1/2, -y+1/2, z'
	'-x+1/2, y, -z+1/2'
	'-x+1/2, y+1/2, -z'
	'-x-1/4, -y+1/4, -z-1/4'
	'-x-1/4, -y-1/4, -z+1/4'
	'-x-1/4, y+1/4, z-1/4'
	'-x-1/4, y-1/4, z+1/4'
	'x, -y, -z'
	'x, -y+1/2, -z+1/2'
	'x, y, z'
	'x, y+1/2, z+1/2'
	'x+1/4, -y+1/4, z+1/4'
	'x+1/4, -y-1/4, z-1/4'
	'x+1/4, y+1/4, -z+1/4'
	'x+1/4, y-1/4, -z-1/4'
	'x+1/2, -y, -z+1/2'
	'x+1/2, -y+1/2, -z'
	'x+1/2, y, z+1/2'
	'x+1/2, y+1/2, z'
	'x-1/4, -y+1/4, z-1/4'
	'x-1/4, -y-1/4, z+1/4'
	'x-1/4, y+1/4, -z-1/4'
	'x-1/4, y-1/4, -z+1/4'
loop_
_atom_site_label
_atom_site_type_symbol
_atom_site_symmetry_multiplicity
_atom_site_fract_x
_atom_site_fract_y
_atom_site_fract_z
_atom_site_occupancy
_atom_site_B_iso_or_equiv
Mg1 Mg  32 0.07506167 0.2538511 0.5386266 1 0.9418
Mg2 Mg  32 0.05121692 0.9264321 0.7394254 1 0.9418
B3 11B  32 0.4471927 0.1492536 0.4238343 1 1
B4 11B  32 0.1092302 0.01627139 0.2722976 1 1
B5 11B  16 0.3082241 0 0 1 1
B6 11B  32 0.4420198 0.6355086 0.5447976 1 1
B7 11B  16 0 0 0.8081731 1 1
h3a 2H  32 0.4392667 0.1442277 0.533491 1 2.5
h3b 2H  32 0.4219032 0.1273405 0.3606482 1 2.5
h3c 2H  32 0.4741826 0.1125692 0.4026681 1 2.5
h3d 2H  32 0.4534184 0.2128771 0.39853 1 2.5
h4a 2H  32 0.09307941 0.04049132 0.3622529 1 2.5
h4b 2H  32 0.08802605 0.009176973 0.1859854 1 2.5
h4c 2H  32 0.1223653 -0.04286584 0.2983778 1 2.5
h4d 2H  32 0.13345 0.05828309 0.2425742 1 2.5
h5a 2H  32 0.3276509 -0.04514924 0.05025406 1 2.5
h5c 2H  32 0.2891821 -0.02996908 -0.07748735 1 2.5
h6a 2H  32 0.4546879 0.5741593 0.5516984 1 2.5
h6b 2H  32 0.4664231 0.678983 0.5243749 1 2.5
h6c 2H  32 0.4271206 0.6509891 0.6425235 1 2.5
h6d 2H  32 0.4198476 0.637903 0.4605934 1 2.5
h7a 2H  32 0.0001152925 -0.05422416 0.7425745 1 2.5
h7c 2H  32 0.0269446 -0.0001792166 0.8743435 1 2.5
